# Supplementary material for: Individual Nutrition Is Associated with Altered Gut Microbiome Composition for Adults with Food Insecurity
Source: MDPI journal article supplement (doi:10.3390/nu14163407), 2022-08-19

## SUPPLEMENTARY TABLES

**Table S1. Covariate Associations.** Results from generalized linear models with covariates only.

| Characteristic                    | MNI <sup>1</sup>  |         | Electrolyte Index <sup>1</sup> |         | Macronutrient Index <sup>2</sup> |         | Mineral Index <sup>1</sup> |         | Vitamin Index <sup>1</sup> |         |
|-----------------------------------|-------------------|---------|--------------------------------|---------|----------------------------------|---------|----------------------------|---------|----------------------------|---------|
|                                   | β (95% CI)        | p-value | OR (95% CI)                    | p-value | OR (95% CI)                      | p-value | OR (95% CI)                | p-value | OR (95% CI)                | p-value |
| Antibiotic use in the past year   |                   |         |                                |         |                                  |         |                            |         |                            |         |
| Did not use                       | —                 |         | —                              |         | —                                |         | —                          |         | —                          |         |
| Did use                           | 0.01 (-3.5, 3.6)  | >0.9    | 1.08 (0.76, 1.53)              | 0.7     | 1.09 (0.76, 1.58)                | 0.6     | 0.95 (0.68, 1.34)          | 0.8     | 0.78 (0.41, 1.43)          | 0.4     |
| Unknown/Missing                   | -3.3 (-11, 4.0)   | 0.4     | 0.96 (0.46, 2.00)              | >0.9    | 1.31 (0.59, 2.80)                | 0.5     | 0.71 (0.34, 1.43)          | 0.3     | 3.25 (1.27, 7.68)          | 0.009   |
| Poverty:Income Ratio              | 0.31 (-0.40, 1.0) | 0.4     | 1.05 (0.98, 1.13)              | 0.2     | 1.02 (0.95, 1.09)                | 0.6     | 0.99 (0.93, 1.07)          | 0.9     | 1.02 (0.92, 1.14)          | 0.7     |
| Education                         |                   |         |                                |         |                                  |         |                            |         |                            |         |
| <High school                      | —                 |         | —                              |         | —                                |         | —                          |         | —                          |         |
| High school or associate's degree | 7.2 (-0.14, 15)   | 0.055   | 3.22 (1.42, 8.28)              | 0.009   | 2.28 (0.96, 6.32)                | 0.081   | 0.66 (0.32, 1.34)          | 0.2     | 1.61 (0.43, 10.5)          | 0.5     |
| Bachelor's degree or higher       | 11 (3.4, 19)      | 0.005   | 3.48 (1.47, 9.22)              | 0.007   | 1.81 (0.73, 5.17)                | 0.2     | 0.96 (0.45, 2.04)          | >0.9    | 2.65 (0.67, 17.8)          | 0.2     |
| Race                              |                   |         |                                |         |                                  |         |                            |         |                            |         |
| White                             | —                 |         | —                              |         | —                                |         | —                          |         | —                          |         |
| Other/non-white                   | -8.6 (-13, -4.0)  | <0.001  | 0.71 (0.45, 1.13)              | 0.15    | 0.66 (0.39, 1.09)                | 0.11    | 0.75 (0.48, 1.17)          | 0.2     | 1.11 (0.47, 2.37)          | 0.8     |
| Food Security Status              |                   |         |                                |         |                                  |         |                            |         |                            |         |
| Food secure                       | —                 |         | —                              |         | —                                |         | —                          |         | —                          |         |
| Food insecure                     | -10 (-15, -5.9)   | <0.001  | 0.60 (0.38, 0.94)              | 0.025   | 0.67 (0.41, 1.09)                | 0.11    | 0.83 (0.53, 1.28)          | 0.4     | 0.82 (0.35, 1.78)          | 0.6     |

OR = Odds Ratio

1. N=614
2. N=607

**Table S2. Stratified Interaction WQSRS.** Results from WQSRS analyses stratified and/or testing for interaction on food security status, adjusted for covariates.

| Index                          | Constraint | Stratified | Interaction | Term                | Estimate/OR | Std. Error | P-value |
|--------------------------------|------------|------------|-------------|---------------------|-------------|------------|---------|
| MNI <sup>1</sup>               | NA         | Yes        | No          | WQS                 | 7.96        | 3.89       | 0.04    |
|                                | Positive   | Yes        | No          | WQS                 | 9.01        | 4.12       | 0.03    |
|                                |            | No         | Yes         | WQS                 | 2.25        | 1.85       | 0.226   |
|                                |            |            |             | WQS*Food insecurity | 3.1         | 4.58       | 0.498   |
|                                |            | Yes        | Yes         | WQS                 | 6.52        | 4          | 0.103   |
|                                |            |            |             | WQS*Food insecurity | 2.05        | 7.35       | 0.78    |
| Electrolyte index <sup>2</sup> | NA         | Yes        | No          | WQS                 | 1.12        | 0.421      | 0.00763 |
|                                | Positive   | Yes        | No          | WQS                 | 1.12        | 0.421      | 0.00754 |
|                                |            | No         | Yes         | WQS                 | 2.49        | 5.03       | 1.00    |
|                                |            |            |             | WQS*Food insecurity | 1.00        | 1.00       | 1.00    |
|                                |            | Yes        | Yes         | WQS                 | 2.37        | 1.43       | 0.0151  |
|                                |            |            |             | WQS*Food insecurity | 1.30        | 2.42       | 0.769   |

1. N=623

2. N=624.

## SUPPLEMENTARY FIGURES

**Figure S1. Sankey Plot without Nodes.** Sankey Plot illustrating the overlap of genera with weights above the threshold (summed OTU weights within genera) from each of the 6 statistically significant WQS<sub>RSRH</sub> analyses testing for association between the microbiome mixture and the nutritional indices. The genera represented show that each genus was found to be highly weighted. Nodes, from right to left, display the WQS<sub>RSRH</sub> analysis outcome (My Nutrition Index/Electrolyte Index) with stratification of WQS<sub>RSRH</sub> weights by food security (not stratified/food secure/food insecure), and bacterial genus.

**Figure S2. MNI WQS<sub>RSRH</sub> OTU Weights.** Sum of OTU mean weights within genera across 100 repeated holdouts above threshold (sorted by phylum) for the MNI WQS<sub>RSRH</sub> analysis. Data points indicate sum of weights within genera for each of the 100 holdouts. Box plots show 25<sup>th</sup>, 50<sup>th</sup>, and 75<sup>th</sup> percentiles of the sum of the weights within genera for the 100 holdouts. Closed diamonds show sum of mean weights within genera for the 100 holdouts.

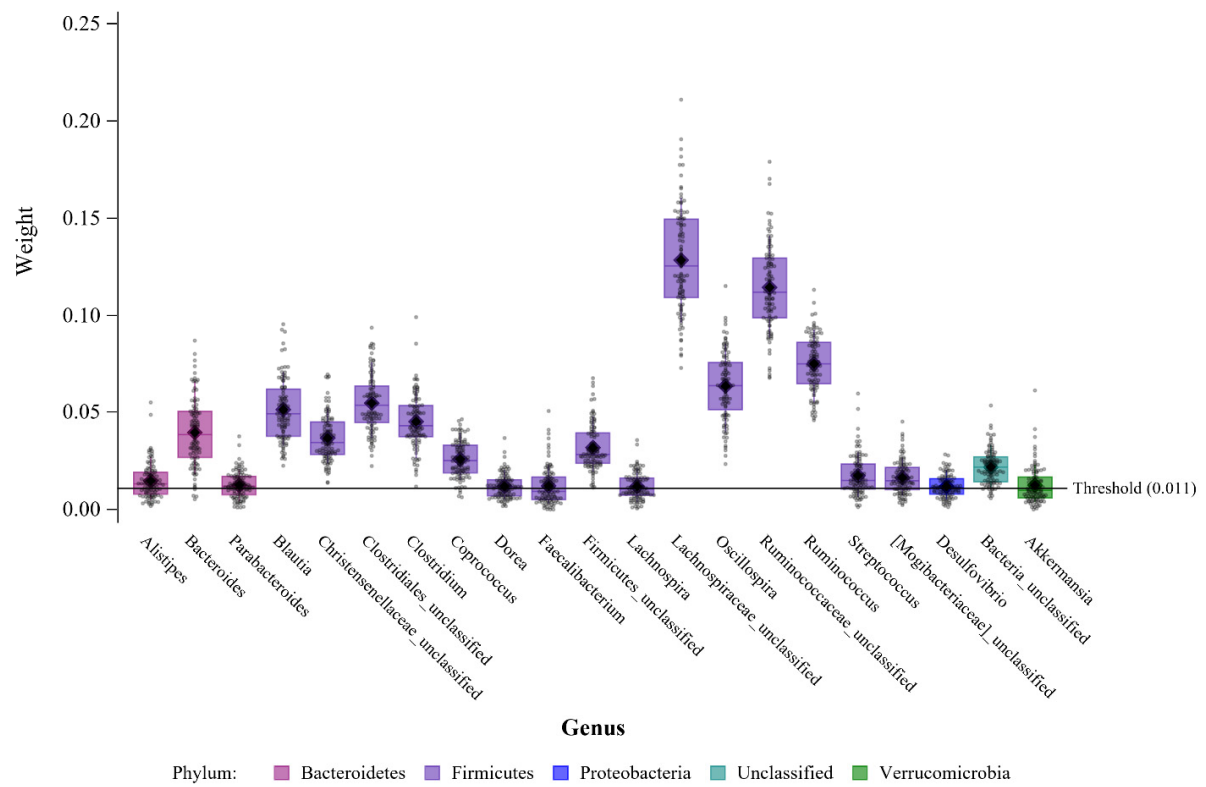

**Figure S3. Electrolyte Index WQS<sub>RSRH</sub> OTU Weights.** Sum of OTU mean weights within genera across 100 repeated holdouts above threshold (sorted by phylum) electrolyte index WQS<sub>RSRH</sub> analysis. Data points indicate sum of weights within genera for each of the 100 holdouts. Box plots show 25<sup>th</sup>, 50<sup>th</sup>, and 75<sup>th</sup> percentiles of the sum of the weights within genera for the 100 holdouts. Closed diamonds show sum of mean weights within genera for the 100 holdouts.

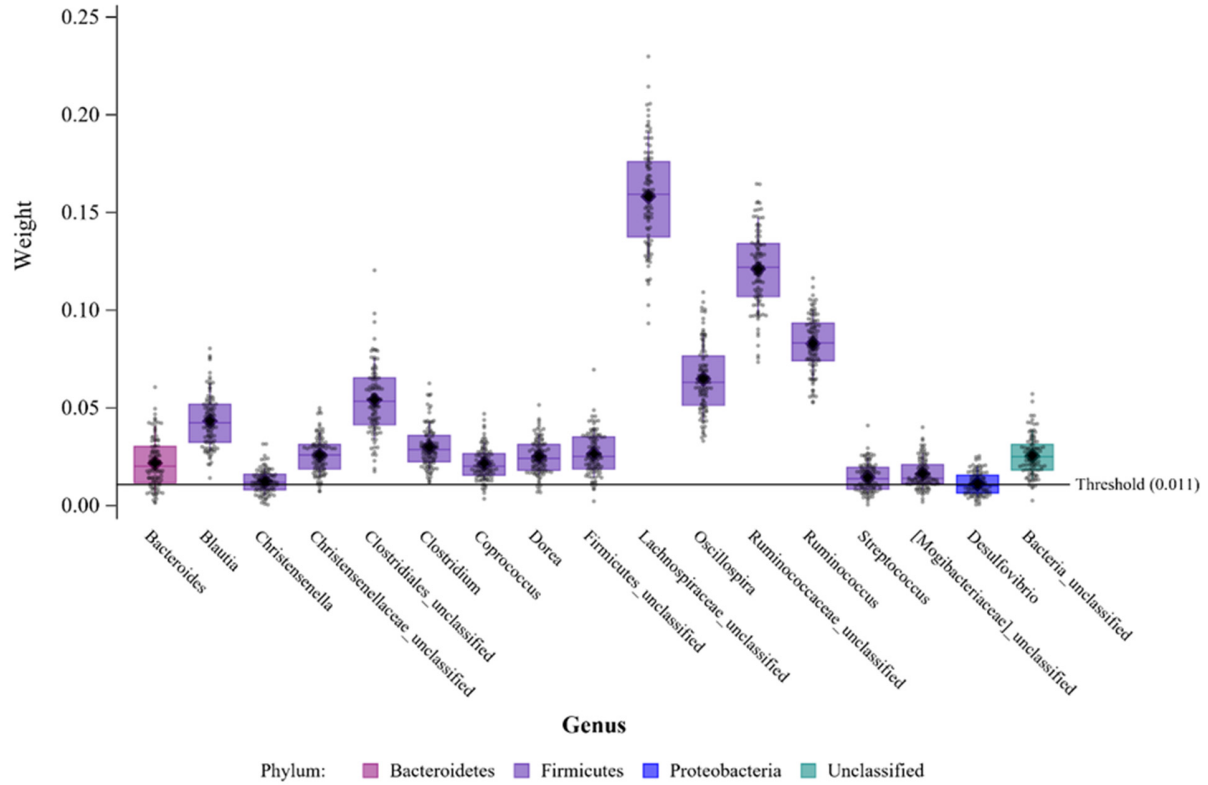

**Figure S4. MNI Stratified WQS<sub>RSRH</sub> Weights.** Genera-specific weights from MNI stratified WQS<sub>RSRH</sub> with weights above the threshold.

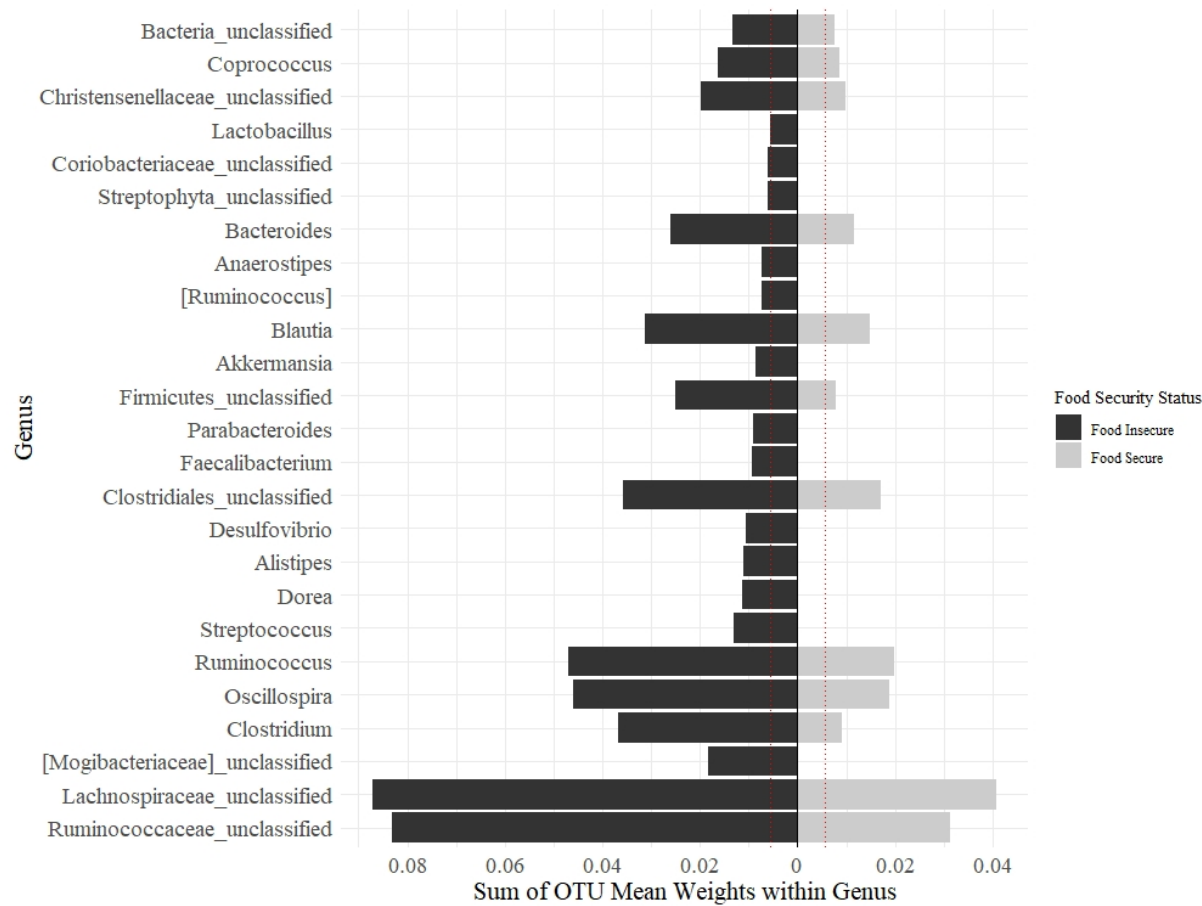

**Figure S5. Electrolyte Index Stratified WQS<sub>RSRH</sub> Weights.** Divergent plot from OTU weights summed within genera for the electrolyte index stratified WQS<sub>RSRH</sub> analysis with weights above threshold

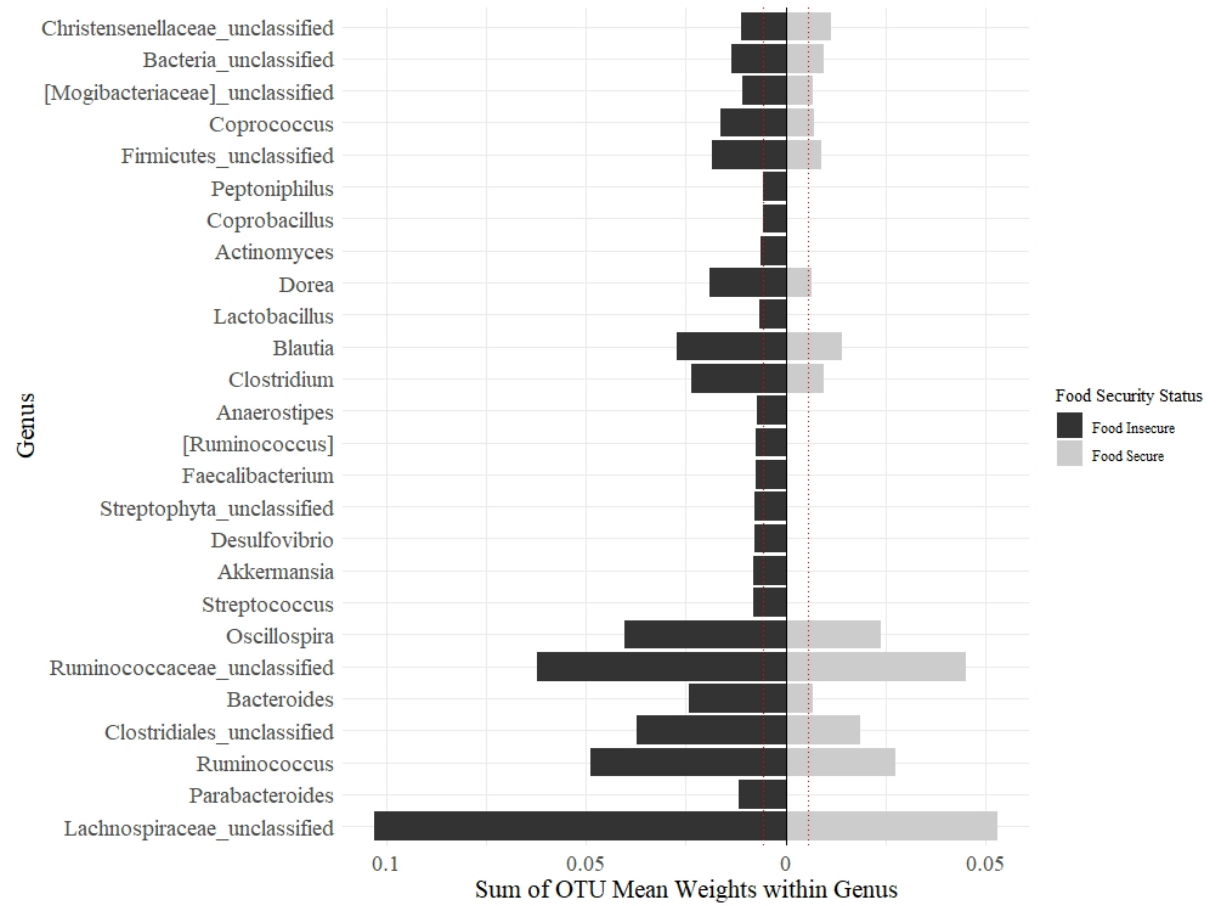

Supplement: s1 [file s1]
